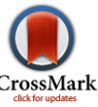

## Correction

# Correction: Growth and Nitrogen Uptake Kinetics in Cultured *Prorocentrum donghaiense*

The PLOS ONE Staff

There is an error in the Funding statement for this article. The correct Funding statement is: “The authors acknowledge the financial support from the China Scholarship Council to Zhangxi Hu. In addition, this work was supported by NOAA and NSF grants to MRM, and Natural Science Foundation of China (NSFC) (Grant Numbers 40776078, 40876074, 41176104, U1133003). The funders had no role in study design, data collection and analysis, decision to publish, or preparation of the manuscript.”

## Reference

1. Hu Z, Duan S, Xu N, Mulholland MR (2014) Growth and Nitrogen Uptake Kinetics in Cultured *Prorocentrum donghaiense*. PLoS ONE 9(4): e94030. doi:10.1371/journal.pone.0094030.

**Citation:** The PLOS ONE Staff (2014) Correction: Growth and Nitrogen Uptake Kinetics in Cultured *Prorocentrum donghaiense*. PLoS ONE 9(7): e102767. doi:10.1371/journal.pone.0102767

**Published:** July 9, 2014

**Copyright:** © 2014 The PLOS ONE Staff. This is an open-access article distributed under the terms of the Creative Commons Attribution License, which permits unrestricted use, distribution, and reproduction in any medium, provided the original author and source are credited.
